# Supplementary material for: Modeling tuberculous meningitis in zebrafish using Mycobacterium marinum
Source: PubMed Central journal article supplement (PMC4142731; doi:10.1242/dmm.015453), 2014-07-04
Supplement: supp_7.9.1111_DMM015453.pdf [file supp_7.9.1111_DMM015453.pdf]

## 1 SUPPLEMENTARY MATERIALS

### 3 **Supplementary figure S1: Orbital granulomas**

4 [A] Normal anatomy of orbit and eye of adult zebrafish (NO = nervous opticus, R = retina,  
5 OF = orbital fat); [B] Large granulomatous mass (\*) in the orbit affecting the optical nerve,  
6 after intraperitoneal infection with *M. marinum*; scale bar = 100  $\mu\text{m}$

### 8 **Supplementary figure S2: BBB functionality shown with FD4 (4 kDa) as a fluorescent** 9 **tracer**

10 [A-B] Casper embryo, injected with fluorescent FD4 at 2 dpf via the caudal vein. Distribution  
11 of the tracer was monitored with confocal microscopy and shows leakage to the ventricles  
12 within the first 30 minutes post injection. [Panel A] Overview of the head of the embryo 90  
13 minutes post injection with accumulation of the tracer in the ventricular system indicating that  
14 the BBB is not formed yet at this time point, scale bar = 150  $\mu\text{m}$ , [Panel B] Enlargement of  
15 the midbrain ventricle and the hindbrain ventricle with dye accumulation, scale bar = 60  $\mu\text{m}$ .  
16 [C-D] Casper embryo, injected with FD4 at 3 dpf via the caudal vein. [Panel C] Overview of  
17 the head of the embryo 90 minutes post injection. A clear pattern of the blood vessels is  
18 visible with minimal leakage of fluorescent dye to the ventricular system, Scale bar = 150  $\mu\text{m}$ .  
19 [Panel D] Enlargement of Panel C, same region as Panel B, Scale bar = 60  $\mu\text{m}$ . [E-F] Casper  
20 embryo, injected with FD4 at 4 dpf via the caudal vein. [Panel E] Overview of the head of the  
21 embryo 90 minutes post injection. A clear pattern of the blood vessels is visible without  
22 leakage of fluorescent dye to the ventricular system, indicating that the BBB is functional at 4  
23 dpf in limiting traversal of molecules of 4 kDa and larger, scale bar = 150  $\mu\text{m}$ . [Panel F]  
24 Enlargement of Panel E, same region as Panel B and D, scale bar = 60  $\mu\text{m}$ .

### 26 **Supplementary figure S3: Method**

27 [A] This diagram shows the injection procedure, the number of infected embryos per injection  
28 route and the CFU counts injected, for *M. marinum* E11, *M. marinum ecCb1::tn*, phenol  
29 red/PBS as control group and *M. marinum* M. We used casper and *Tg(fli1:GFP)* zebrafish.  
30 The number of embryos stained with anti-L-plastin and anti-acetylated tubulin is depicted in  
31 the bottom of A.

1 [B] This diagram shows the procedure followed for experiments with zebrafish larvae. Larvae  
2 were infected via the heart at 21-25 dpf, analysis took place 11 dpi. dpf = days post  
3 fertilization; dpi = days post infection.

4

5 **Supplementary table S1**

6 This table shows all casper and *Tg(Fli1:GFP)<sup>y1</sup>* casper embryos infected with *M. marinum*  
7 E11 and stained with anti-acetylated tubulin (in cases of non-transgenic zebrafish) to  
8 determine localization of early granulomas.

9

10 **Supplementary table S2**

11 This table shows all casper embryos infected with *M. marinum* E11 and stained with anti-L-  
12 plastin to analyse cluster composition and confirm that these clusters are indeed early  
13 granulomas.

14

15 **Supplementary table S3**

16 This table shows all casper and *Tg(Fli1:GFP)<sup>y1</sup>* casper embryos infected with *M. marinum*  
17 *eccCb1::tn* and stained with anti-acetylated tubulin (in cases of non-transgenic zebrafish) to  
18 determine localization of early granulomas.

19

20 **Supplementary table S4**

21 This table shows all casper embryos infected with *M. marinum eccCb1::tn* and stained with  
22 anti-L-plastin to analyse cluster composition and confirm that these clusters are indeed early  
23 granulomas.

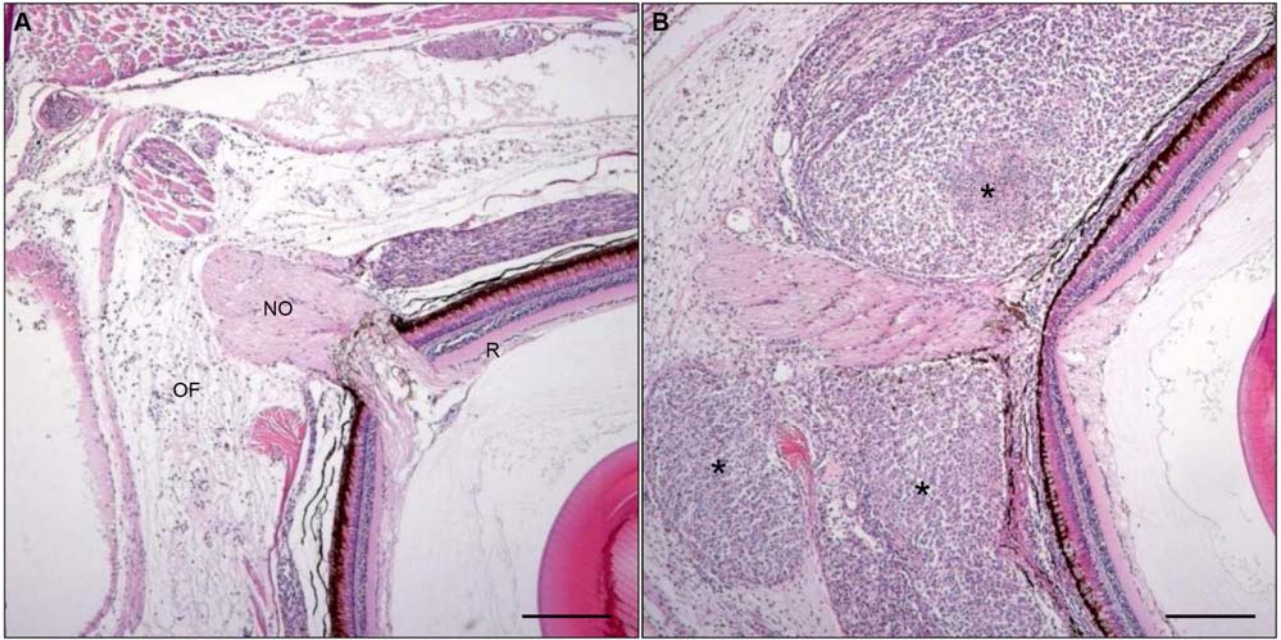

1

2 Supplementary figure S1

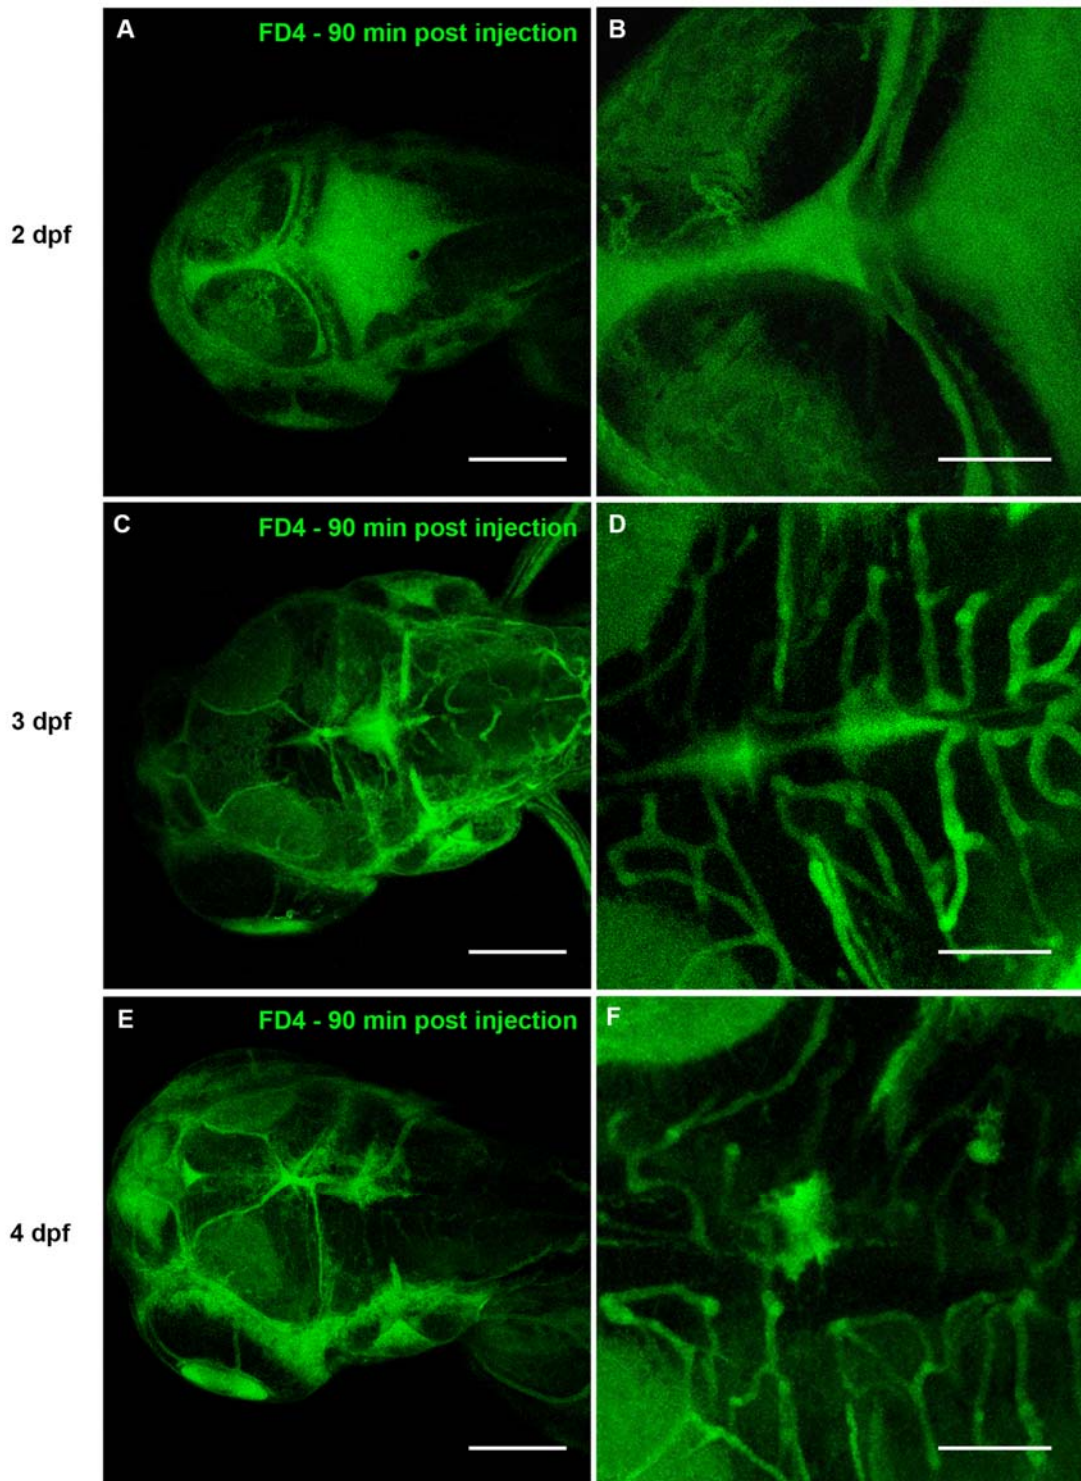

1

2 Supplementary figure S2

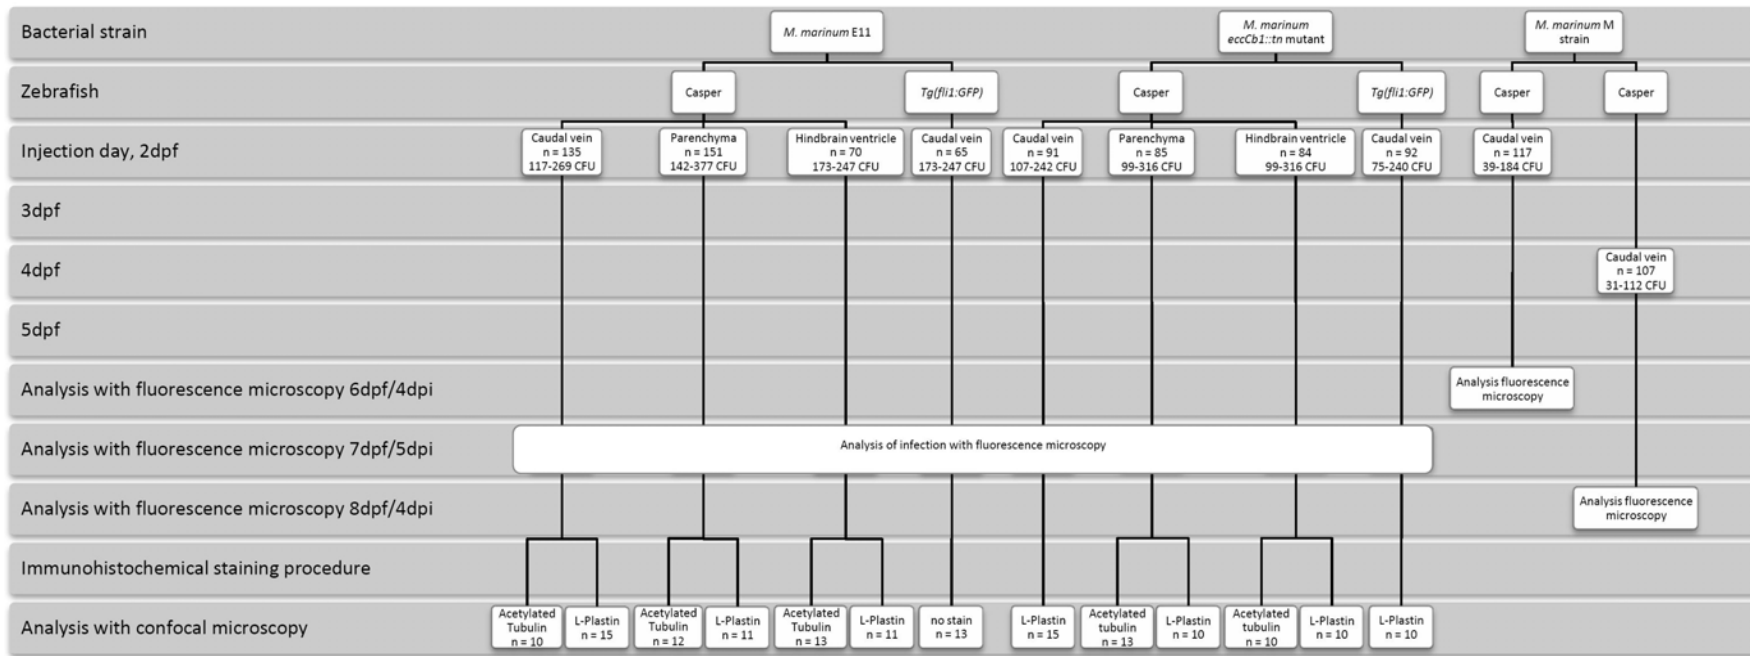

1

Supplementary Figure 3A



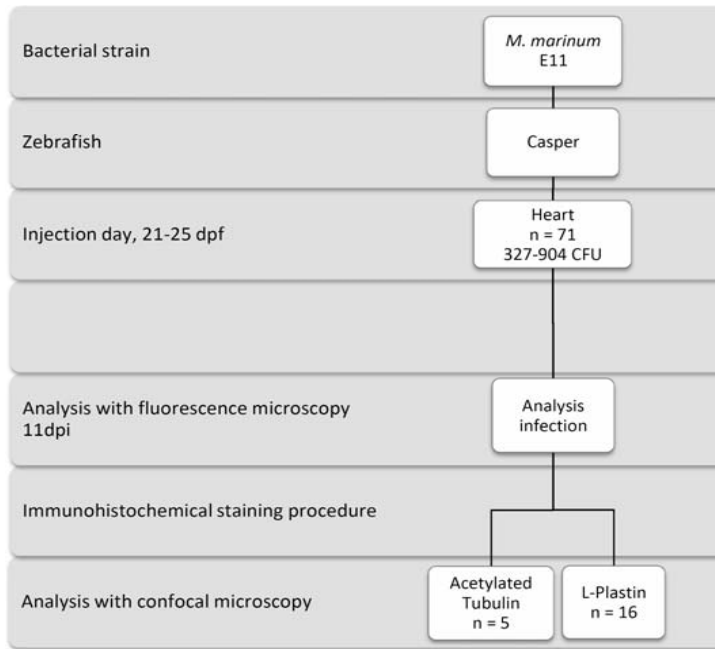

**Supplementary Figure 3B**

| Route of injection                                                                         |                                                                                                        | Number                                            |
|--------------------------------------------------------------------------------------------|--------------------------------------------------------------------------------------------------------|---------------------------------------------------|
| <b>Parenchyma</b>                                                                          | Number of infected zebrafish analyzed with fluorescence microscopy                                     | 151 (9 experiments, 8-23 embryos per experiment)  |
|                                                                                            | CFU injected                                                                                           | 142-377 CFU (mean: 230 CFU)                       |
|                                                                                            | - Bacterial clusters in brain area                                                                     | 95-100%                                           |
|                                                                                            | Number of zebrafish stained with anti-acetylated tubulin                                               | 12                                                |
|                                                                                            | Total number of early granulomas                                                                       | 36 (1-7/embryo)                                   |
|                                                                                            | Number of early granulomas at injection spot                                                           | 11 (11/12 embryos)                                |
|                                                                                            | Disseminated disease                                                                                   | 10 embryos                                        |
|                                                                                            | - Early granulomas at distant location                                                                 | 25 (10/12 embryos)                                |
|                                                                                            | o Expansion of primary cluster via parenchyma                                                          | 13/25 (10/10 embryos)                             |
|                                                                                            | o Expansion/dissemination via CSF                                                                      | 12/25 (9/10 embryos)                              |
|                                                                                            | - Single bacteria                                                                                      | 10/12 embryos                                     |
|                                                                                            | o In parenchyma                                                                                        | 9/10 embryos                                      |
|                                                                                            | o In ventricular system                                                                                | 9/10 embryos                                      |
|                                                                                            | Early granulomas in ventricular wall                                                                   | 9 (7/12 embryos)                                  |
|                                                                                            | - Without invasion of parenchyma                                                                       | 2/9                                               |
|                                                                                            | - With invasion of parenchyma                                                                          | 7/9                                               |
| <b>Hindbrain ventricle (HBV)</b>                                                           | Number of infected zebrafish analyzed with fluorescence microscopy                                     | 70 (4 experiments, 15-22 embryos per experiment)  |
|                                                                                            | CFU injected                                                                                           | 173-377 CFU (mean: 260 CFU)                       |
|                                                                                            | - Bacterial clusters in brain area                                                                     | 95-100%                                           |
|                                                                                            | Number of zebrafish stained with anti-acetylated tubulin                                               | 13                                                |
|                                                                                            | Total number of early granulomas                                                                       | 48 (1-8/embryo)                                   |
|                                                                                            | Number of early granulomas at injection spot                                                           | 25/48 (13/13 embryos)                             |
|                                                                                            | Disseminated disease                                                                                   | 13 embryos                                        |
|                                                                                            | - Early granulomas at distant location                                                                 | 23/48 (9/13 embryos)                              |
|                                                                                            | o Single clusters in parenchyma                                                                        | 9/23 (6/9 embryos)                                |
|                                                                                            | o Located in ventricular system (other than HBV)                                                       | 14/23 (8/9 embryos)                               |
|                                                                                            | - Single bacteria                                                                                      | 13/13 embryos                                     |
|                                                                                            | o In parenchyma                                                                                        | 11/13 embryos                                     |
|                                                                                            | o In ventricular system                                                                                | 11/13 embryos                                     |
|                                                                                            | Early granulomas in ventricular wall (HBV included)                                                    | 12/48 (9/13 embryos)                              |
|                                                                                            | - Without invasion of parenchyma                                                                       | 2/12                                              |
|                                                                                            | - With invasion of parenchyma                                                                          | 10/12                                             |
| <b>Caudal Vein</b>                                                                         | Number of infected zebrafish analyzed with fluorescent microscopy                                      | 135 (5 experiments, 18-44 embryos per experiment) |
|                                                                                            | CFU injected                                                                                           | 117-269 CFU (mean: 197 CFU)                       |
|                                                                                            | - Bacterial clusters in brain area                                                                     | 70%                                               |
|                                                                                            | Number of zebrafish stained with anti-acetylated tubulin                                               | 10                                                |
|                                                                                            | Total number of early granulomas                                                                       | 30 (1-6/embryo)                                   |
|                                                                                            | Localization of early granulomas                                                                       |                                                   |
|                                                                                            | - Parenchyma                                                                                           |                                                   |
|                                                                                            | o Hindbrain                                                                                            | 6/30                                              |
|                                                                                            | o Midbrain                                                                                             | 16/30                                             |
|                                                                                            | o Forebrain                                                                                            | 3/30                                              |
|                                                                                            | - Ventricles                                                                                           |                                                   |
|                                                                                            | o Hindbrain ventricle                                                                                  | 3/30                                              |
|                                                                                            | o Midbrain ventricle                                                                                   | 2/30                                              |
|                                                                                            | o Forebrain ventricle                                                                                  | -                                                 |
|                                                                                            | Number of infected <i>Tg(Fli1:GFP)<sup>fl</sup></i> casper embryo analyzed with fluorescent microscopy | 65 (experiments, embryos per experiment)          |
|                                                                                            | CFU injected                                                                                           | 173-247 CFU (mean: CFU)                           |
| Number of <i>Tg(Fli1:GFP)<sup>fl</sup></i> casper embryo analyzed with confocal microscopy | 17 (4/17 L-Plastin, 13/17 without additional staining)                                                 |                                                   |
| Total number of early granulomas                                                           | 48 (1-8/embryo)                                                                                        |                                                   |
| - Early granulomas in close relationship with vasculature                                  | 18/48 (11 embryos)                                                                                     |                                                   |
| - Early granulomas solitary in parenchyma                                                  | 30/48 (17 embryos)                                                                                     |                                                   |

|                                          |               |
|------------------------------------------|---------------|
| Single bacteria                          | 16/17 embryos |
| - In close relationship with vasculature | 13/16         |
| - Solitary in parenchyma                 | 15/16         |

---

1 **Supplementary table S1**



1

| <b>Route of injection</b>  |                                                                    | <b>Number</b>                                     |
|----------------------------|--------------------------------------------------------------------|---------------------------------------------------|
| <b>Parenchyma</b>          | Number of infected zebrafish analyzed with fluorescence microscopy | 151 (9 experiments, 8-23 embryos per experiment)  |
|                            | CFU injected                                                       | 142-377 CFU (mean: 230 CFU)                       |
|                            | - Bacterial clusters in brain area                                 | 95-100%                                           |
|                            | Number of zebrafish stained with anti-L-plastin                    | 11                                                |
|                            | Total number of early granulomas                                   | 31 (1-5/embryo)                                   |
|                            | Single phagocytes filled with a large amount of bacteria           | 6 (4/11 embryos)                                  |
|                            | Ratio bacteria – phagocytes                                        |                                                   |
|                            | - Bacteria = phagocytes                                            | 19/31                                             |
|                            | - Bacteria > phagocytes                                            | 11/31                                             |
|                            | - Bacteria < phagocytes                                            | 1/31                                              |
| <b>Hindbrain ventricle</b> | Number of infected zebrafish analyzed with fluorescence microscopy | 70 (4 experiments, 15-22 embryos per experiment)  |
|                            | CFU injected                                                       | 173-377 CFU (mean: 260)                           |
|                            | - Bacterial clusters in brain area                                 | 95-100%                                           |
|                            | Number of zebrafish stained with anti-L-plastin                    | 11                                                |
|                            | Total number of early granulomas                                   | 38 (1-7/embryo)                                   |
|                            | Single phagocytes filled with a large amount of bacteria           | 10 (4/11 embryos)                                 |
|                            | Ratio bacteria – phagocytes                                        |                                                   |
|                            | - Bacteria = phagocytes                                            | 33/38                                             |
|                            | - Bacteria > phagocytes                                            | 5/38                                              |
|                            | - Bacteria < phagocytes                                            | 0/38                                              |
| <b>Caudal Vein</b>         | Number of infected zebrafish analyzed with fluorescence microscopy | 135 (5 experiments, 18-44 embryos per experiment) |
|                            | CFU injected                                                       | 117-269 CFU (mean: 197 CFU)                       |
|                            | - Bacterial clusters in brain area                                 | 70%                                               |
|                            | Number of zebrafish stained with anti-L-plastin                    | 11                                                |
|                            | Total number of early granulomas                                   | 44 (2-11/embryo)                                  |
|                            | Single phagocytes filled with a large amount of bacteria           | 19 (9/11 embryos)                                 |
|                            | Ratio bacteria – phagocytes                                        |                                                   |
|                            | - Bacteria = phagocytes                                            | 38/44                                             |
| - Bacteria > phagocytes    | 6/44                                                               |                                                   |
| - Bacteria < phagocytes    | 0/44                                                               |                                                   |

2

3

4

**Supplementary table S2**

| Route of injection            |                                                                                                          | Number                                           |
|-------------------------------|----------------------------------------------------------------------------------------------------------|--------------------------------------------------|
| Parenchyma                    | Number of infected zebrafish analyzed with fluorescence microscopy                                       | 85 (4 experiments, 18-24 embryos per experiment) |
|                               | CFU injected                                                                                             | 99-316 CFU (mean: 200 CFU)                       |
|                               | - Bacterial clusters in brain area                                                                       | 96-100%                                          |
|                               | Number of zebrafish stained with anti-acetylated tubulin                                                 | 13                                               |
|                               | Total number of early granulomas                                                                         | 44 (1-5/embryo)                                  |
|                               | Number of early granulomas at injection spot                                                             | 10/44 (10/13 embryos)                            |
|                               | Disseminated disease                                                                                     |                                                  |
|                               | - Early granulomas at distant location                                                                   | 34 (11/13 embryos)                               |
|                               | o Expansion of primary cluster via parenchyma                                                            | 9 (10/11 embryos)                                |
|                               | o Expansion/dissemination via CSF                                                                        | 25 (11/11 embryos)                               |
|                               | - Single bacteria                                                                                        | 13/13 embryos                                    |
|                               | o In parenchyma                                                                                          | 10/13 embryos                                    |
|                               | o In ventricular system                                                                                  | 11/13 embryos                                    |
|                               | Early granulomas in ventricular wall                                                                     | 17 (11/13 embryos)                               |
|                               | - Without invasion of parenchyma                                                                         | 4/17                                             |
| - With invasion of parenchyma | 13/17                                                                                                    |                                                  |
| Hindbrain ventricle (HBV)     | Number of infected zebrafish analyzed with fluorescence microscopy                                       | 84 (4 experiments, 18-23 embryos per experiment) |
|                               | CFU injected                                                                                             | 99-316 CFU (mean: 200 CFU)                       |
|                               | - Bacterial clusters in brain area                                                                       | 88-100%                                          |
|                               | Number of zebrafish stained with anti-acetylated tubulin                                                 | 10                                               |
|                               | Total number of early granulomas                                                                         | 23 (1-5/embryo)                                  |
|                               | Number of early granulomas at injection spot                                                             | 8 (7/10 embryos)                                 |
|                               | Disseminated disease                                                                                     |                                                  |
|                               | - Early granulomas at distant location                                                                   | 15 (8/10 embryos)                                |
|                               | o Single clusters in parenchyma                                                                          | 8 (5/8 embryos)                                  |
|                               | o Located in ventricular system (other than HBV)                                                         | 7 (6/8 embryos)                                  |
|                               | - Single bacteria                                                                                        | 10/10 embryos                                    |
|                               | o In parenchyma                                                                                          | 9/10 embryos                                     |
|                               | o In ventricular system                                                                                  | 10/10 embryos                                    |
|                               | Early granulomas in ventricular wall (HBV included)                                                      | 9 (8/10 embryos)                                 |
|                               | - Without invasion of parenchyma                                                                         | 2/9                                              |
| - With invasion of parenchyma | 7/9                                                                                                      |                                                  |
| Caudal Vein                   | Number of infected <i>Tg(Flil:GFP)<sup>yl</sup></i> casper embryos analyzed with fluorescence microscopy | 92 (3 experiments, 29-33 embryos per experiment) |
|                               | CFU injected                                                                                             | 75-240 CFU (mean: 163 CFU)                       |
|                               | - Bacterial clusters in brain area                                                                       | 53%                                              |
|                               | Number of <i>Tg(Flil:GFP)<sup>yl</sup></i> casper embryos stained with anti-L-plastin analyzed           | 10                                               |
|                               | Total number of early granulomas                                                                         | 8 (1-3/embryo, 5 embryos)                        |
|                               | - Early granulomas in close relationship with vasculature                                                | 1/8                                              |
|                               | - Early granulomas solitary in parenchyma                                                                | 7/8                                              |
|                               | Total number of single phagocytes filled with a large amount of bacteria                                 | 39 (1-8/embryo, 10 embryos)                      |
| - Inside blood vessel         | 12/39 (5 embryos)                                                                                        |                                                  |
| - Outside blood vessel        | 27/39 (10 embryos)                                                                                       |                                                  |

1  
2  
3

### Supplementary table S3

1  
2

| Route of injection      |                                                                                                          | Number                                           |
|-------------------------|----------------------------------------------------------------------------------------------------------|--------------------------------------------------|
| Parenchyma              | Number of infected zebrafish analyzed with fluorescence microscopy                                       | 85 (4 experiments, 18-24 embryos per experiment) |
|                         | CFU injected                                                                                             | 99-316 CFU (mean: 200 CFU)                       |
|                         | - Bacterial clusters in brain area                                                                       | 96-100%                                          |
|                         | Number of zebrafish stained with anti-L-plastin                                                          | 10                                               |
|                         | Total number of early granulomas                                                                         | 37 (1-9/ embryo, 10 embryos)                     |
|                         | Single phagocytes filled with a large amount of bacteria                                                 | 85 (1-19/ embryo, 10 embryos)                    |
|                         | Ratio bacteria – phagocytes, granulomas                                                                  |                                                  |
|                         | - Bacteria = phagocytes                                                                                  | 30/37                                            |
|                         | - Bacteria > phagocytes                                                                                  | 3/37                                             |
|                         | - Bacteria < phagocytes                                                                                  | 4/37                                             |
| Hindbrain ventricle     | Number of infected zebrafish analyzed with fluorescence microscopy                                       | 84 (4 experiments, 18-23 embryos per experiment) |
|                         | CFU injected                                                                                             | 99-316 CFU (mean: 200 CFU)                       |
|                         | - Bacterial clusters in brain area                                                                       | 88-100%                                          |
|                         | Number of zebrafish stained with anti-L-plastin                                                          | 10                                               |
|                         | Total number of early granulomas                                                                         | 39 (1-7/embryo, 10 embryos)                      |
|                         | Single phagocytes filled with a large amount of bacteria                                                 | 60 (1-10/embryo, 10 embryos)                     |
|                         | Ratio bacteria – phagocytes                                                                              |                                                  |
|                         | - Bacteria = phagocytes                                                                                  | 29/39                                            |
|                         | - Bacteria > phagocytes                                                                                  | 1/39                                             |
|                         | - Bacteria < phagocytes                                                                                  | 7/39                                             |
| Caudal Vein             | Number of infected casper embryos analyzed with fluorescence microscopy                                  | 91 (3 experiments, 29-31 embryos per experiment) |
|                         | CFU injected                                                                                             | 107-242 CFU (mean: 165 CFU)                      |
|                         | - Bacterial clusters in brain area                                                                       | 33%                                              |
|                         | Number of infected <i>Tg(Fli1:GFP)<sup>fl</sup></i> casper embryos analyzed with fluorescence microscopy | 92 (3 experiments, 29-33 embryos per experiment) |
|                         | CFU injected                                                                                             | 75-240 CFU (mean: 163 CFU)                       |
|                         | - Bacterial clusters in brain area                                                                       | 53 %                                             |
|                         | Number of zebrafish stained with anti-L-plastin                                                          | 25                                               |
|                         | Total number of early granulomas                                                                         | 16 (1-3/embryo, 13 embryos)                      |
|                         | Single phagocytes filled with a large amount of bacteria                                                 | 132 (1-15/embryo, 25 embryos)                    |
|                         | Ratio bacteria – phagocytes                                                                              |                                                  |
| - Bacteria = phagocytes | 15/16                                                                                                    |                                                  |
| - Bacteria > phagocytes | 0/16                                                                                                     |                                                  |
| - Bacteria < phagocytes | 1/16                                                                                                     |                                                  |

3  
4  
5  
6  
7  
8  
9  
10

**Supplementary table S4**
